# Supplementary material for: Force field induced heterogeneous molecular orientation within polyacrylonitrile monofilaments
Source: Royal Society of Chemistry journal article supplement (doi:10.1039/c8ra06310a), 2018-01-01
Supplement: c8ra06310a1.pdf [file c8ra06310a1.pdf]

## Supporting information

### Force field induced heterogeneous molecular orientation within polyacrylonitrile monofilament

Yang Sha<sup>a</sup>, Wei Liu<sup>a</sup>, Mengfan Wang<sup>b</sup>, Jiangu Wu<sup>a</sup>, Weiyu Cao<sup>\*a</sup>

<sup>a</sup> State key laboratory of organic-inorganic composites, College of material science and engineering, Beijing University of Chemical Technology, Beijing, 100029, China <sup>b</sup> Department of Future Industry-Oriented Basic Science and Materials, Toyota Technological Institute, Tempaku, Nagoya, 461-8511, Japan

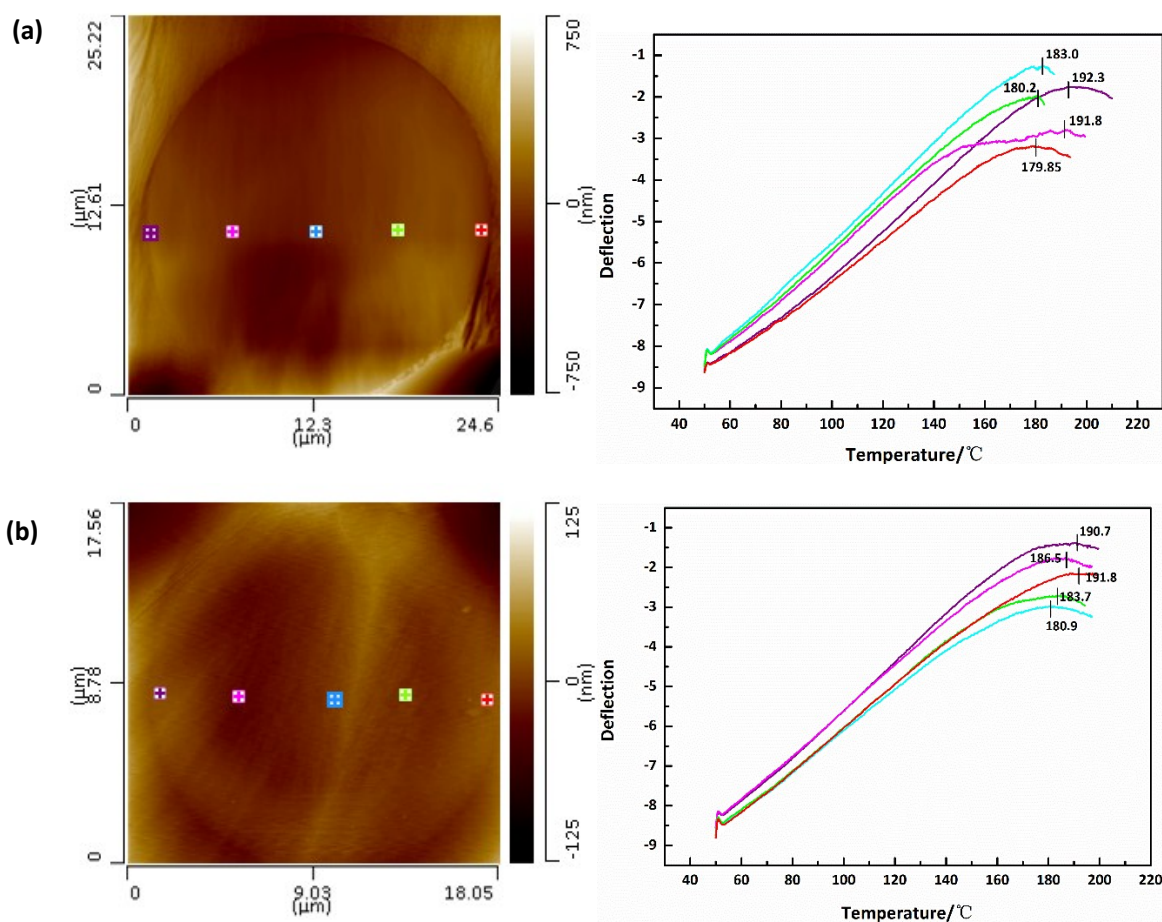

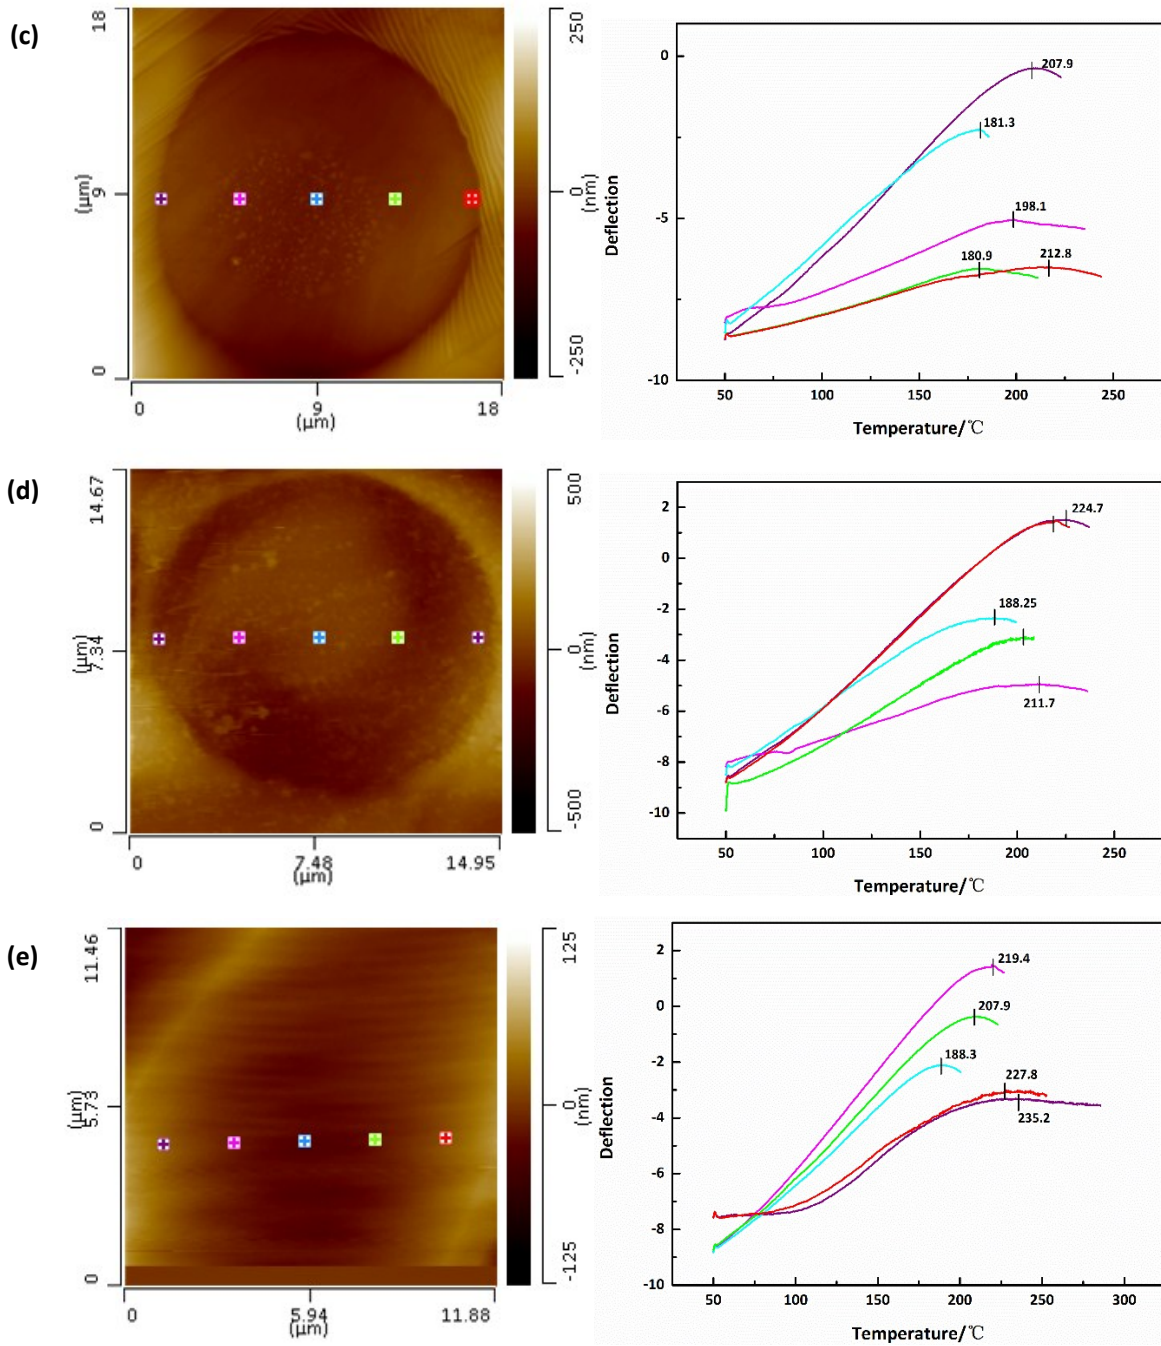

**Fig.S1** (a)-(e) AFM height mapping of the cross section combined with corresponding Nano-TA measurement results for sample D2-D6.
